# Supplementary material for: Comprehensive Analyses of SARS-CoV-2 Transmission in a Public Health Virology Laboratory
Source: MDPI journal article supplement (doi:10.3390/v12080854), 2020-08-05
Supplement: s1 [file s1]

# Supplementary Materials: Comprehensive Analyses of SARS-CoV-2 Transmission in a Public Health Virology Laboratory

**Table S1.** mixed-nucleotide mutations.

| Mut Pos.  | Gene         | Mix %                          |
|-----------|--------------|--------------------------------|
| <b>S1</b> |              |                                |
| 22977     | spike        | T (71%, 5), C (29%, 2)         |
| 22932     | spike        | G (85%, 11), C (15%, 2)        |
| <b>S3</b> |              |                                |
| 11842     | nsp6         | G (80%, 21951), T (20%, 5618)  |
| 17435     | nsp13        | G (76%, 16558), C (24%, 5121)  |
| 19406     | nsp14        | G (81%, 180), C (19%, 41)      |
| 22979     | spike        | T (71%, 5), C (29%, 2)         |
| 25202     | spike        | T (76%, 23060), C (24%, 7152)  |
| 28290     | nucleocapsid | T (54%, 35324), C (45%, 29474) |
| 29091     | nucleocapsid | C (72%, 21499), T (28%, 8206)  |

Mixed-nucleotide differences identified in samples S1 and S3. The nucleotide position, gene and mix % are indicated for each mutation.

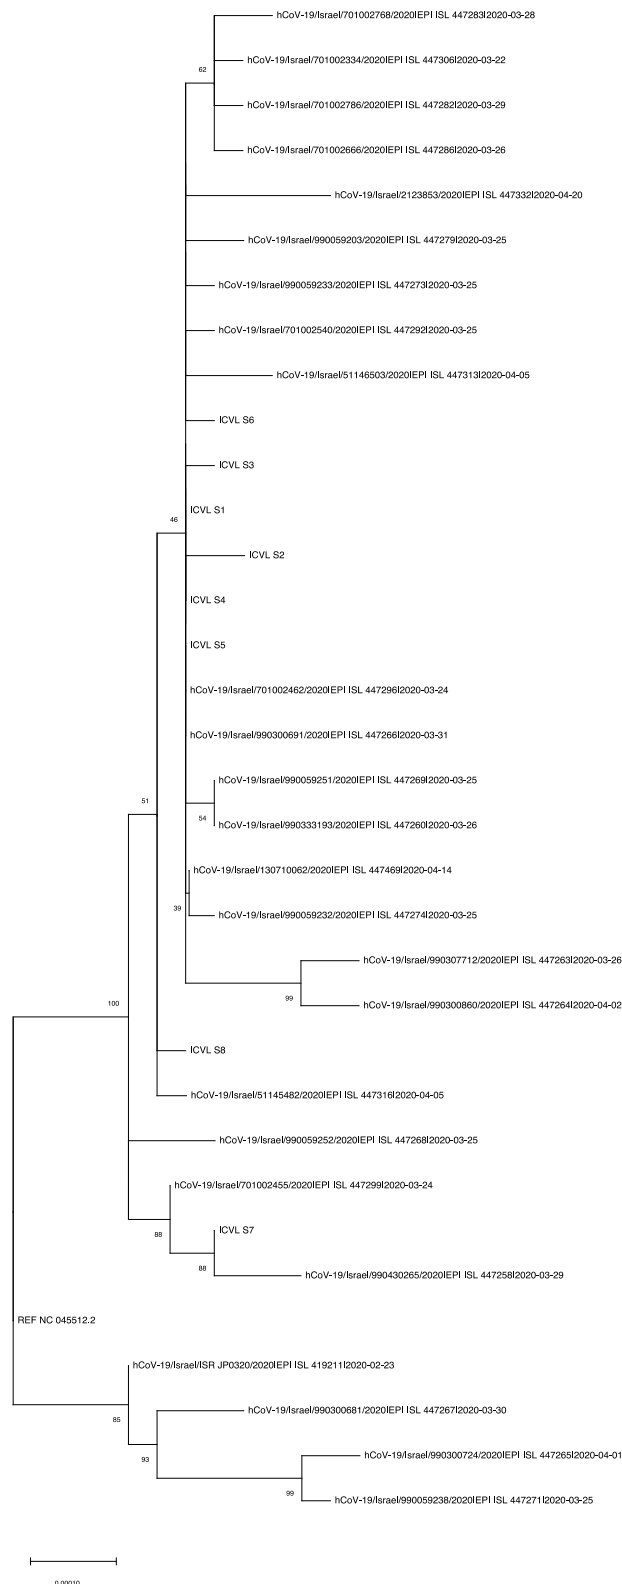

**Figure S1.** Whole genome-based phylogenetic tree of ICVL local outbreak and additional Israel-based samples. Phylogenetic tree of six ICVL samples (S1–6), two family-related samples (S7–8), SARS-CoV-2 reference sequence (NC 045512.2) and 25 randomly chosen Israel-based samples downloaded from GISAID. Tree was inferred by maximum likelihood based on the GTR + I + G evolutionary model. The robustness of branching pattern was tested by 1000 bootstrap replications

and the percentage of successful bootstrap replicates is indicated at the nodes, where only values of >60% are indicated.
